# Supplementary material
Source: PubMed Central journal article supplement (PMC6007032)
Supplement: NIHMS969652-supplement.pdf [file NIHMS969652-supplement.pdf]

## Supplemental Information

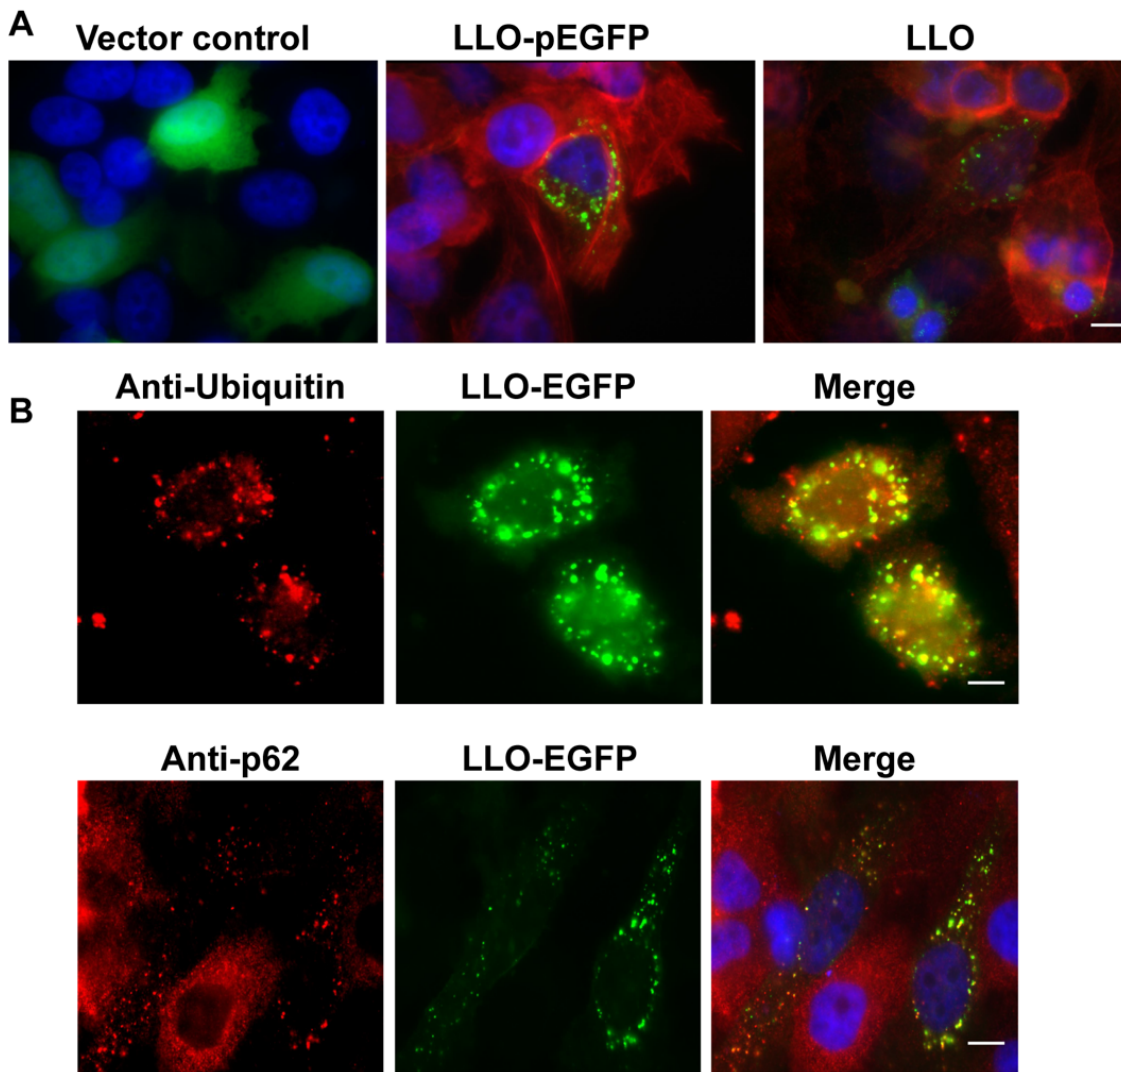

**Figure S1**

**Figure S1. Related to Figure 1. Transient expression of LLO in HeLa cell formed punctate structure and colocalized with ubiquitin and p62 in HeLa cells.**

(A) HeLa cells were transfected with LLO-pEGFP-N1 (LLO-EGFP) or LLO-pcDNA3 (LLO-no tag) plasmids for 24 hours. HeLa cells transfected with empty pEGFP-N1 plasmid were used as controls (left panel). Cells were fixed and stained with nuclear dye DAPI (blue), anti-LLO antibody (green) and rhodamine-labeled phalloidin for actin (red). (B) HeLa cells were transfected with LLO-pEGFP-N1 (LLO-EGFP) plasmids for 24 hours and stained with nuclear dye DAPI (blue), anti-Ubiquitin antibody (green) or anti-p62 antibody (green). Scale bars are 10  $\mu\text{m}$ .

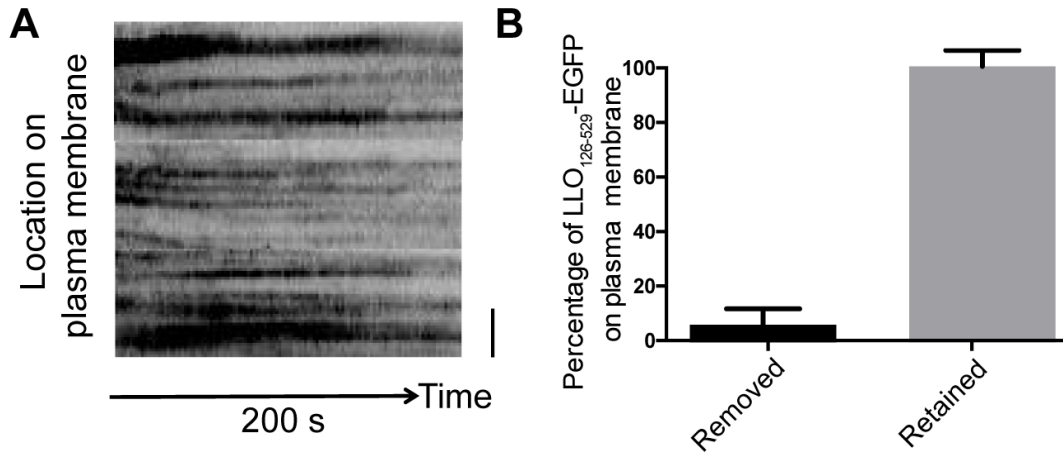

**Figure S2**

**Figure S2. Related to Figure 2. N-terminal truncated LLO<sub>126-529</sub> cannot be efficiently removed from the plasma membrane in transfected cells.**

(A) Representative kymograph from a time-series TIRF imaging of plasma membrane-associated LLO<sub>126-529</sub>-EGFP. Bar, 1  $\mu$ m. (B) The percentage of LLO<sub>126-529</sub>-EGFP signal removed from plasma membrane within 540 seconds of time-series obtained using 100-ms exposures. (N=100 EGFP sites in 4 cells).

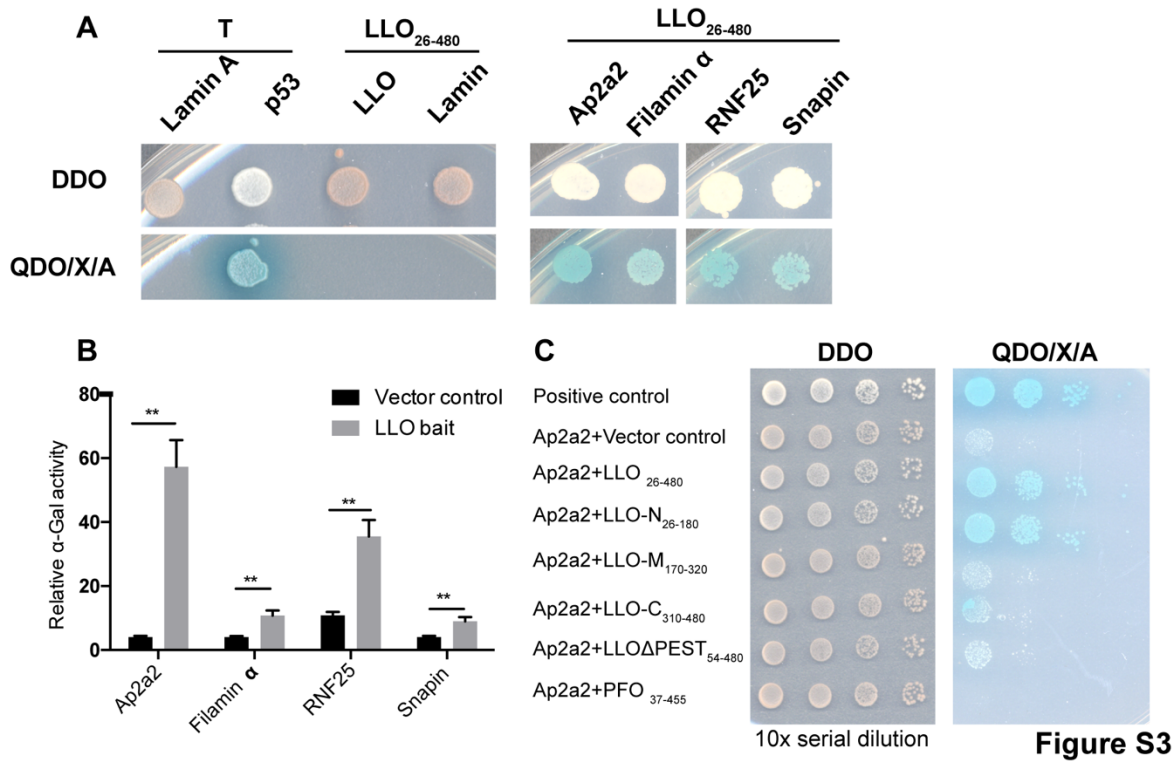

**Figure S3. Related to Figure 3. Identification of Ap2a2 as the LLO PEST-like region interacting protein using yeast two-hybrid assay.**

(A) Representative images on auxotrophic selecting plate following a GAL4-based two-hybrid interaction in *S. cerevisiae*. (B) Quantification of secreted alpha-galactosidase activity from the culture supernatant of Y2HGold yeast colonies. The negative control experiment was performed using pGBKT7-Lam (which encodes the Gal4 BD fused with lamin) as bait plasmid. The results represented the percentage of alpha-galactosidase activity of positive control (p53+ SV40 large T antigen). (C) Representative image on auxotrophic selecting plate following a GAL4-based two-hybrid interaction in *S. cerevisiae* that expressed Ap2a2 and different fragments of LLO or PFO.

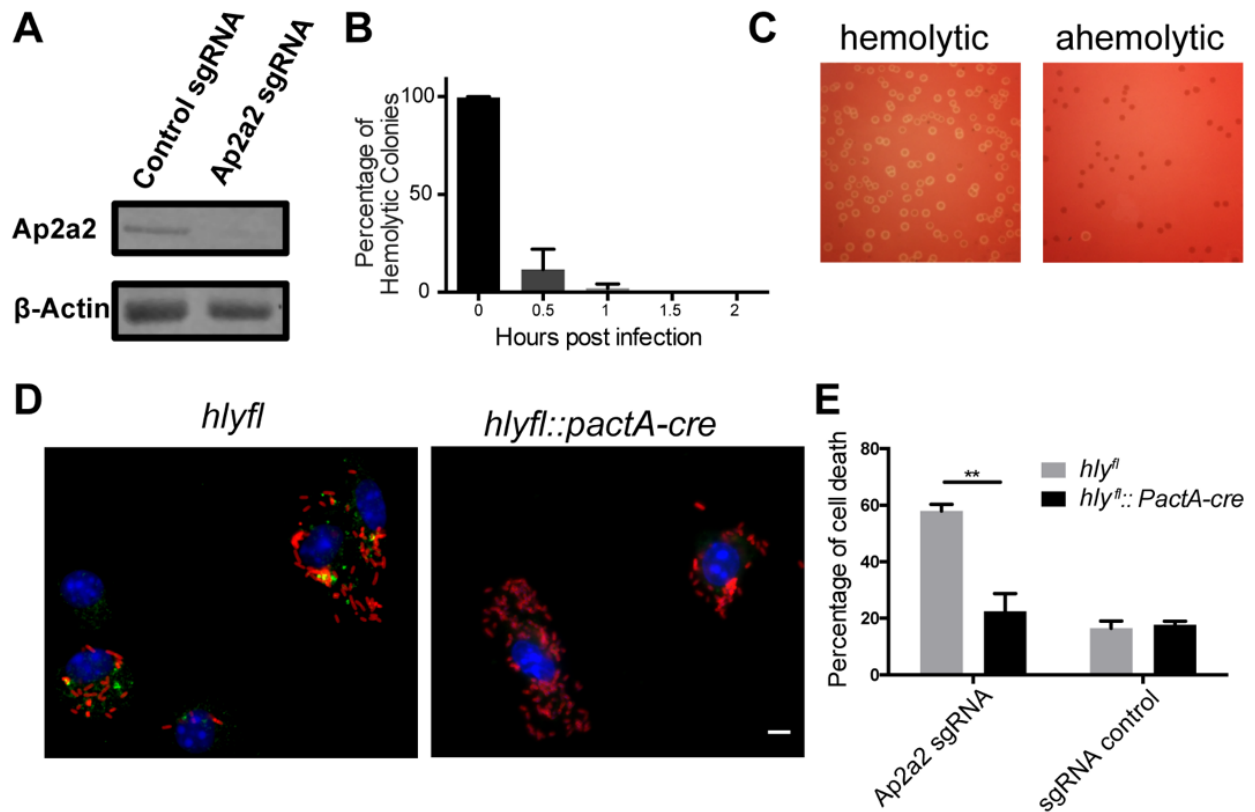

**Figure S4**

**Figure S4. Related to Figure 4. Cytosolic deletion of *hly* gene rescued the cytotoxicity of *L. monocytogenes* in Ap2a2 knockdown BMMs.**

(A) Western blot analysis of the efficiency of CRISPR/Cas9-mediated Ap2a2 knockout in Cas9<sup>+</sup> BMMs. (B) To quantify the excision efficiency of *hly*<sup>fl</sup> during infection, BMMs were infected with *hly*<sup>fl</sup> and lysed in water at different times post-infection. Both hemolytic and ahemolytic colonies recovered from BMMs were enumerated by plating bacteria on blood agar plates as excision of *hly* results in loss of hemolytic activity. (C) Representative images of hemolytic and ahemolytic colonies on blood agar plates. (D) Representative images of BMMs infected with *hly*<sup>fl</sup> strain and *hly*<sup>fl</sup>::*pactA-cre* strains for 5 hours. Cells were fixed and stained with nuclear dye DAPI (blue), anti-LLO antibody (green), and anti-*L. monocytogenes* antibody (red). Scale bar is 10 μm. (E) LDH release from BMMs infected with *hly*<sup>fl</sup> control bacteria or *hly*<sup>fl</sup> expressing the Cre recombinase at 8 hours post infection. Bars and error represent mean ± SD of replicate measurements. \*\* p<0.01 (Student's t test).

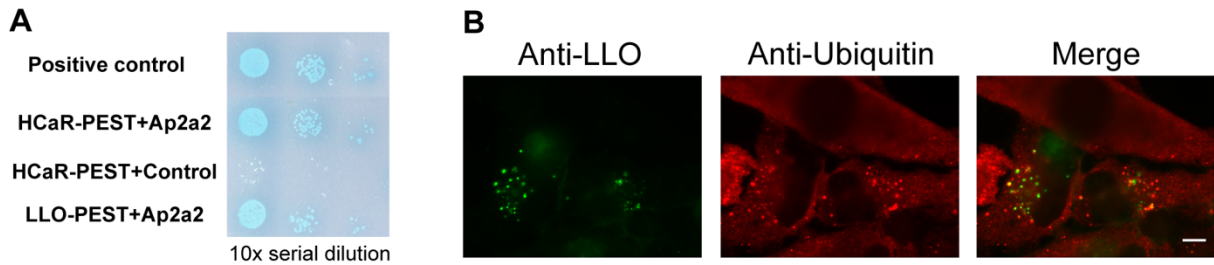

**Figure S5**

**Figure S5. Related to Figure 5. The PEST-like sequence from human calcium receptor (HCaR-PEST) is sufficient to interact with Ap2a2 and promotes the formation of intracellular punctates in transfected HeLa cells.**

(A) Representative Image of spotting assay on auxotrophic selecting plate following a GAL4-based two-hybrid interaction in *S. cerevisiae*. (B) HeLa cells were transfected with HCaR-LLO-pcDNA3 plasmids for 24 hours. Cells were fixed and stained with anti-LLO antibody (green) and anti-Ubiquitin antibody (red). Scale bars is 10  $\mu$ m.

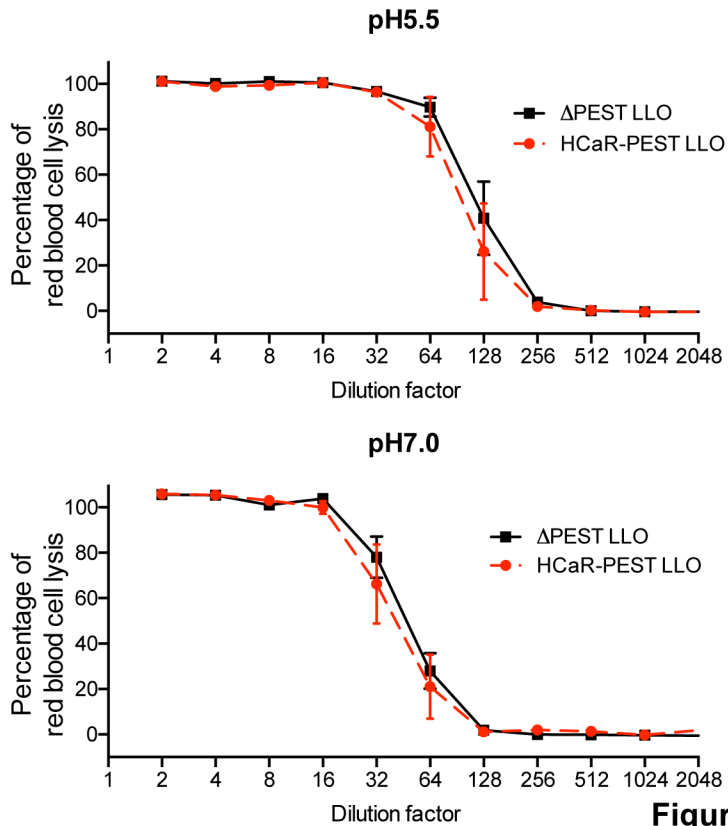

**Figure S6**

**Figure S6. Related to Figure 5. Comparison the hemolytic activity of secreted PEST LLO and HCaR-PEST LLO.**

Logarithmic phase bacterial culture supernatants were normalized to 1 at OD<sub>600nm</sub>. Hemolytic activities of two-fold serial diluted supernatants were quantified at pH 5.5 and pH 7.0.
